# Supplementary material for: Continuous-flow liquid-phase dehydrogenation of 1,4-cyclohexanedione in a structured multichannel reactor
Source: Royal Society of Chemistry journal article supplement (doi:10.1039/c8re00176f), 2018-11-06
Supplement: c8re00176f1.pdf [file c8re00176f1.pdf]

## Electronic Supplementary Information (ESI)

### Continuous-flow liquid-phase dehydrogenation of 1,4-cyclohexanedione in a structured multichannel reactor

M. Arsalan Ashraf <sup>\*,a</sup>, Julia Tan<sup>a</sup>, Matthew G. Davidson<sup>b</sup>, Steven Bull<sup>b</sup>, Marc Hutchby<sup>b</sup>, Davide Mattia<sup>a</sup>, Pawel Plucinski<sup>\*,a</sup>

<sup>a</sup> Department of Chemical Engineering, University of Bath, Claverton Down, Bath BA27AY, United Kingdom

<sup>b</sup> Department of Chemistry, University of Bath, Claverton Down, Bath BA27AY, United Kingdom

#### S.1. Supplementary Information

The experiments for liquid phase dehydrogenation of 1,4-cyclohexanedione were performed in a mm-scale structured multichannel reactor which was developed at University of Bath<sup>1</sup> as shown in Fig. S1. The reactor consists of five catalytic channels of square shape with dimensions of 2 mm × 2 mm (one channel), 3 mm × 3 mm (three channels), and 5 mm × 5 mm (one channel). Each channel is equipped with upfront 6 cm long static mixer and inlet ports for liquid feed and gas streams. The static mixer served as feed preheater for endothermic dehydrogenation reaction. The total length of catalytic channel is 10 cm and the channel outlet is designed in a way the catalyst particles can be packed and removed easily from the reactor.

The scheme of experimental setup used in this study is shown in Fig. 1. The liquid feed was stored in the feed vessel and pumped at flow rates ( $F_L$ ) of 0.10 – 0.50 mL/min ( $0.7 - 3.3 \text{ m}^3 \text{ m}^{-2} \text{ h}^{-1}$  at STP) using a HPLC isocratic pump (Series I, 10 ml/min). The  $\text{N}_2$  gas flow ( $F_G$ ) was controlled at 5 – 85 mL/min ( $33.3 - 602.1 \text{ m}^3 \text{ m}^{-2} \text{ h}^{-1}$  at STP) with a mass flow controller (Bronkhorst, 100 ml/min). The reactor temperature was controlled by using integrated heat exchange system which circulated silicon oil (Sil 260) as heat transfer fluid (HTF) via a Phoenix-II (P1-B7) heating re-circulator. A thermocouple was inserted at the HTF inlet to monitor the reactor temperature ( $T$ ). The reactor outlet pressure was maintained at 1.5 bar using the pressure control valve (PCV) and the back pressure regulator (BPR). The pressure drop across the reactor was monitored using a Bronkhorst differential pressure transducer. The reactor effluent was passed through a low dead volume six-way valve (Valco) to collect samples for analysis. The liquid was stored in a stainless-steel gas-liquid separator from where the

---

\* Corresponding author: [M.A.Ashraf@bath.ac.uk](mailto:M.A.Ashraf@bath.ac.uk) (M. Arsalan Ashraf)  
[P.Plucinski@bath.ac.uk](mailto:P.Plucinski@bath.ac.uk) (Pawel Plucinski)

gaseous effluent was cooled at 20 °C in a condenser and condensable was separated in liquid trap for the purpose to reduce load on the hydrocarbon trap. The temperature of reactor outlet tubing and of gas-liquid separator was maintained at 30 °C by using electric trace heating. The LabVIEW software was utilized for monitoring, controlling, and data acquisition of temperature and pressure drop during experimental evaluation.

The overall liquid-solid mass transfer co-efficient ( $k_{LS}$ ) was calculated from Dwidevi and Upadhyay correlation<sup>2</sup> as given by Eq. (S1) which is valid for liquids with Reynold number values > 0.01 in fixed bed reactors.

$$k_{LS} = \frac{Sh D_{AB}}{d_p} \quad (S1)$$

where  $\varepsilon_b$  is the catalyst bed voidage (0.40),  $Sh$  is the Sherwood number,  $D_{AB}$  is the diffusion coefficient, and  $d_p$  is the average diameter of catalyst particles (64.4  $\mu\text{m}$ ).

Sherwood number ( $Sh$ )<sup>3</sup> was calculated as

$$Sh = J_D Sc^{1/3} Re \quad (S2)$$

$$\varepsilon_b J_D = \frac{0.765}{Re^{0.82}} + \frac{0.365}{Re^{0.386}} \quad (S3)$$

Schmidt number ( $Sc$ )<sup>3</sup> was calculated as

$$Sc = \frac{\mu_L}{\rho_L D_{AB}} \quad (S4)$$

Reynold number ( $Re$ )<sup>3</sup> was calculated as

$$Re = \frac{d_p u_L \rho_L}{\mu_L} \quad (S5)$$

where  $\mu_L$  is the feed mixture viscosity (Pa.s),  $\rho_L$  is the feed mixture density (kg/m<sup>3</sup>), and  $u_L$  is the superficial liquid feed velocity (m/s).

Diffusion coefficient ( $D_{AB}$ ) of 1,4 cyclohexanedione in solvent liquid was calculated by using Wilke-Change equation<sup>4</sup> described by Eq. (S6).

$$D_{AB} = \frac{117.3 \times 10^{-18} (x M_B)^{1/2} T}{\mu_L v_A^{0.6}} \quad (S6)$$

where  $M_B$  is the molecular weight of tetraethylene glycol dimethyl ether (kg/kmol),  $x$  is the interaction coefficient (1.0 for ether),  $T$  is the temperature (K), and  $v_A$  is the molar volume of 1,4 cyclohexanedione at normal boiling point (m<sup>3</sup>/kmol).

The effective diffusivity ( $D_{eff}$ )<sup>5-7</sup> was estimated by Eq. (S7) with one empirical constant for a given material.

$$D_{eff} = D_{AB} \frac{(1 - \lambda)^2}{1 + P\lambda} \quad (S7)$$

where  $\lambda$  is the ratio of the radius of diffusing molecule (0.51 nm) to the pore radius (2.05 nm) and  $P$  is the fitting parameter (16.3).

The tortuosity ( $\tau_b=1.58$ ) of catalyst packed bed was calculated using Eq. (S8) as given in the study by Puncochar and Drahos.<sup>8</sup>

$$\tau_b = \frac{1}{\sqrt{\varepsilon_b}} \quad (S8)$$

## References

1. D. V. Bavykin, A. A. Lapkin, S. T. Kolaczkowski and P. K. Plucinski, *Applied Catalysis A: General*, 2005, **288**, 175-184.
2. P. N. Dwivedi and S. N. Upadhyay, *Ind Eng Chem Proc Dd*, 1977, **16**, 157-165.
3. H. S. Fogler, *Essentials of Chemical Reaction Engineering*, Pearson Education, 2010.
4. C. R. Wilke and P. Chang, *AIChE Journal*, 1955, **1**, 264-270.
5. M. Ternan, *The Canadian Journal of Chemical Engineering*, 1987, **65**, 244-249.
6. M. A. Vannice, *Kinetics of Catalytic Reactions*, Springer US, 2006.
7. S. Mukherjee and M. A. Vannice, *Journal of Catalysis*, 2006, **243**, 108-130.
8. T. B. Drew, G. R. Cokelet, J. W. Hoopes and T. Vermeulen, *Advances in Chemical Engineering*, Elsevier Science, 1981.

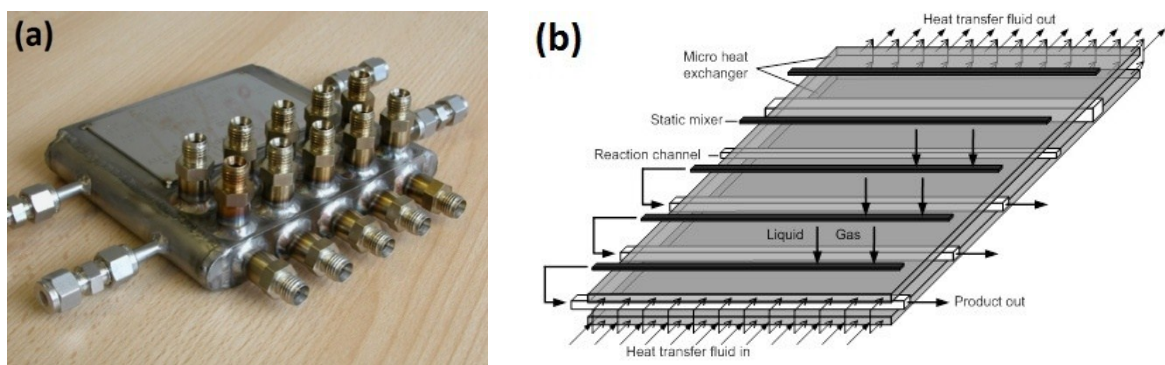

**Fig. S1.** The mm-scale structured multichannel catalytic reactor: (a) reactor assembly, (b) schematic diagram of reactor internals.

**Table S1.** Experimental design for continuous dehydrogenation of 1,4-cyclohexanedione

| Experiment Name | Run Order | Process parameters |                   |                   |                   | Response                     |                               |                                 |
|-----------------|-----------|--------------------|-------------------|-------------------|-------------------|------------------------------|-------------------------------|---------------------------------|
|                 |           | T                  | F <sub>G</sub>    | F <sub>L</sub>    | C <sub>o</sub>    | Conversion (Y <sub>1</sub> ) | Selectivity (Y <sub>2</sub> ) | Pressure Drop (Y <sub>3</sub> ) |
|                 |           | (X <sub>1</sub> )  | (X <sub>2</sub> ) | (X <sub>3</sub> ) | (X <sub>4</sub> ) |                              |                               |                                 |
| N1              | 14        | 199                | 5                 | 0.1               | 1                 | 14.1                         | 99.2                          | 1.3                             |
| N2              | 12        | 220                | 40                | 0.1               | 1                 | 60.5                         | 99.3                          | 3.1                             |
| N3              | 6         | 180                | 80                | 0.1               | 1                 | 19.9                         | 99.4                          | 4.2                             |
| N4              | 20        | 235                | 80                | 0.1               | 1                 | 67.7                         | 97.4                          | 3.5                             |
| N5              | 17        | 235                | 5                 | 0.2               | 1                 | 61.2                         | 99.4                          | 1.7                             |
| N6              | 28        | 181                | 5                 | 0.3               | 1                 | 1.5                          | 99.8                          | 3.0                             |
| N7              | 23        | 236                | 5                 | 0.5               | 1                 | 15.3                         | 99.4                          | 3.0                             |
| N8              | 22        | 199                | 20                | 0.5               | 1                 | 3.6                          | 99.2                          | 5.9                             |
| N9              | 21        | 181                | 80                | 0.5               | 1                 | 2.6                          | 99.4                          | 8.8                             |
| N10             | 18        | 235                | 80                | 0.5               | 1                 | 15.1                         | 99.5                          | 7.2                             |
| N11             | 19        | 179                | 5                 | 0.1               | 5                 | 8.0                          | 99.5                          | 1.4                             |
| N12             | 16        | 199                | 80                | 0.2               | 5                 | 40.0                         | 99.8                          | 4.6                             |
| N13             | 13        | 239                | 20                | 0.3               | 5                 | 57.7                         | 99.3                          | 3.7                             |
| N14             | 11        | 219                | 5                 | 0.5               | 5                 | 9.9                          | 99.4                          | 2.2                             |
| N15             | 15        | 179                | 40                | 0.5               | 5                 | 0.9                          | 99.3                          | 2.7                             |
| N16             | 24        | 199                | 5                 | 0.1               | 10                | 17.8                         | 99.6                          | 1.6                             |
| N17             | 2         | 240                | 5                 | 0.1               | 10                | 79.1                         | 91.9                          | 0.5                             |
| N18             | 27        | 180                | 80                | 0.1               | 10                | 23.1                         | 99.6                          | 4.1                             |
| N19             | 30        | 239                | 80                | 0.1               | 10                | 60.7                         | 95.0                          | 2.0                             |
| N20             | 3         | 180                | 20                | 0.2               | 10                | 4.5                          | 99.5                          | 3.0                             |
| N21             | 26        | 220                | 5                 | 0.32              | 10                | 13.4                         | 99.6                          | 2.2                             |
| N22             | 4         | 199                | 40                | 0.3               | 10                | 8.9                          | 99.8                          | 5.5                             |
| N23             | 1         | 180                | 5                 | 0.5               | 10                | 0.6                          | 99.6                          | 3.3                             |
| N24             | 25        | 239                | 5                 | 0.5               | 10                | 16.9                         | 97.7                          | 3.6                             |
| N25             | 5         | 238                | 40                | 0.5               | 10                | 25.9                         | 99.5                          | 5.9                             |
| N26             | 10        | 180                | 80                | 0.5               | 10                | 1.5                          | 99.2                          | 6.6                             |
| N27             | 29        | 220                | 80                | 0.5               | 10                | 18.1                         | 99.6                          | 7.0                             |
| N28             | 8         | 220                | 40                | 0.3               | 5                 | 28.9                         | 99.2                          | 5.0                             |
| N29             | 9         | 221                | 40                | 0.3               | 5                 | 27.1                         | 99.7                          | 5.3                             |
| N30             | 7         | 220                | 40                | 0.3               | 5                 | 29.8                         | 99.7                          | 4.6                             |
| N31             | 34        | 233                | 30                | 0.1               | 10                | 79.8                         | 93.3                          | 2.7                             |
| N32             | 33        | 233                | 60                | 0.1               | 10                | 74.0                         | 97.4                          | 4.1                             |
| N33             | 32        | 233                | 60                | 0.5               | 10                | 18.4                         | 99.1                          | 8.3                             |
| N34             | 31        | 233                | 80                | 0.5               | 10                | 18.0                         | 99.0                          | 11.7                            |

Y<sub>1</sub> = conversion (X, %) of 1,4-cyclohexanedione, Y<sub>2</sub> = selectivity (S, %) to hydroquinone, Y<sub>3</sub> = pressure drop (ΔP, bar), X<sub>1</sub> = temperature (T, °C), X<sub>2</sub> = nitrogen flow (F<sub>G</sub>, mL/min), X<sub>3</sub> = liquid feed flow (F<sub>L</sub>, mL/min), X<sub>4</sub> = 1,4-cyclohexanedione concentration (C<sub>o</sub>, wt %) in tetraethylene glycol dimethyl ether.

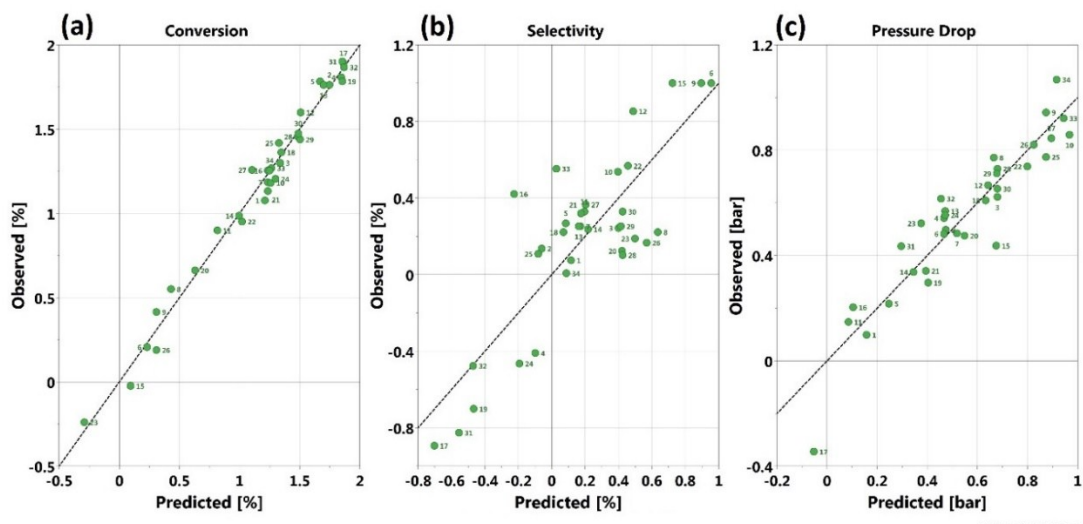

**Fig. S2.** The predicted versus observed values of (a) conversion of 1,4-cyclohexanedione (%), (b) selectivity to hydroquinone (%), (c) pressure drop (bar) for continuous multiphase dehydrogenation of 1,4-cyclohexanedione.

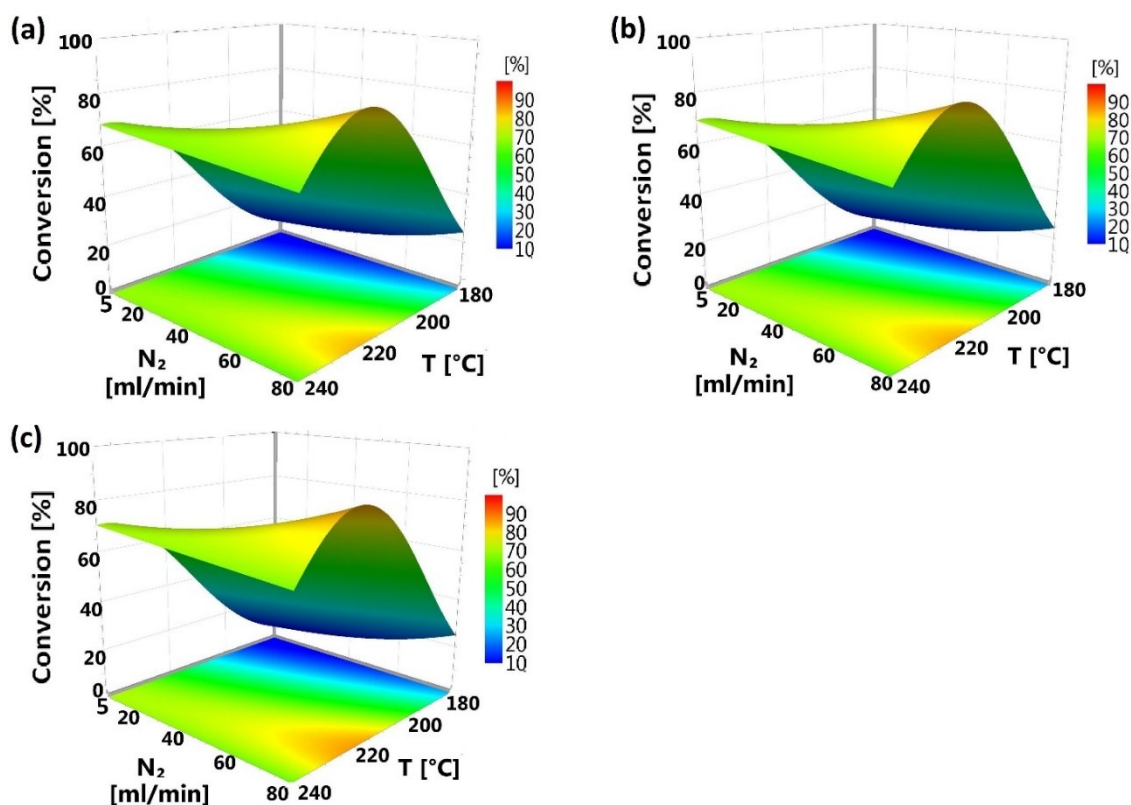

**Fig. S3.** Influence of temperature (180 – 240°C) and  $N_2$  flow (5 – 80 mL/min,  $33.3 - 566.7 \text{ m}^3 \text{ m}^{-2} \text{ h}^{-1}$  at STP) on the conversion of 1,4-cyclohexanedione for liquid feed flow of 0.1 mL/min ( $0.7 \text{ m}^3 \text{ m}^{-2} \text{ h}^{-1}$  at STP) and 1,4-cyclohexanedione concentration of (a) 1 wt%, (b) 5 wt%, (c) 10 wt% in tetraethylene glycol dimethyl ether.

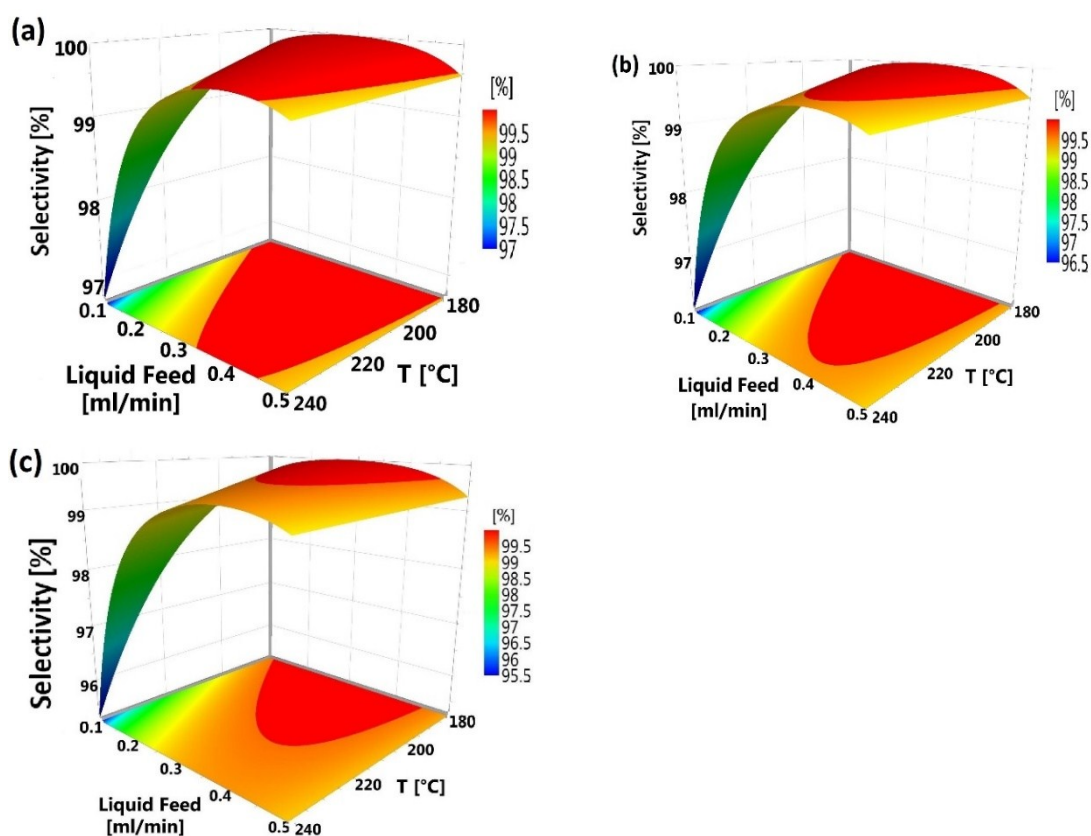

**Fig. S4.** Influence of temperature (180 – 240°C) and liquid feed flow (0.1 – 0.5 mL/min, 0.7 – 3.3 m<sup>3</sup> m<sup>-2</sup> h<sup>-1</sup> at STP) on the selectivity to hydroquinone for N<sub>2</sub> flow of 5 mL/min (33.3 m<sup>3</sup> m<sup>-2</sup> h<sup>-1</sup> at STP) and substrate concentration of (a) 1 wt%, (b) 5 wt%, (c) 10 wt% in tetraethylene glycol dimethyl ether.

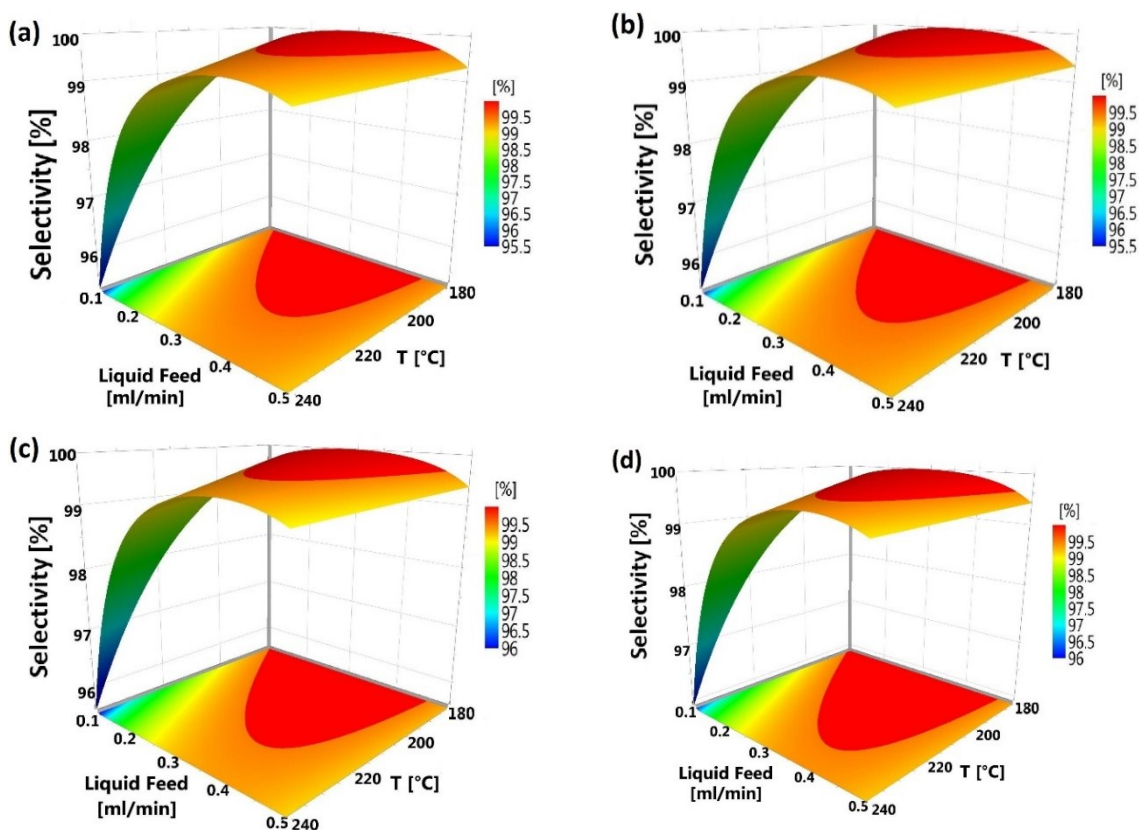

**Fig. S5.** Influence of temperature (180 – 240°C) and liquid feed flow (0.1 – 0.5 mL/min, 0.7 – 3.3 m<sup>3</sup> m<sup>-2</sup> h<sup>-1</sup> at STP) on the selectivity to hydroquinone for 1,4-cyclohexanedione concentration of 10 wt% in tetraethylene glycol dimethyl ether and N<sub>2</sub> flow of (a) 5 mL/min (33.3 m<sup>3</sup> m<sup>-2</sup> h<sup>-1</sup> at STP), (b) 20 mL/min (133.2 m<sup>3</sup> m<sup>-2</sup> h<sup>-1</sup> at STP), (c) 40 mL/min (266.4 m<sup>3</sup> m<sup>-2</sup> h<sup>-1</sup> at STP), (d) 80 mL/min (566.7 m<sup>3</sup> m<sup>-2</sup> h<sup>-1</sup> at STP).

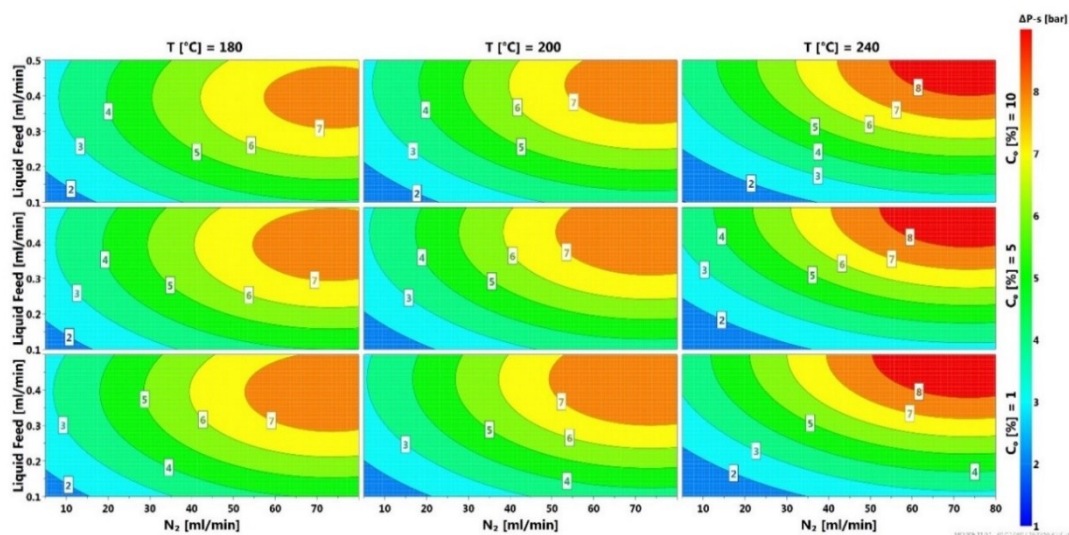

**Fig. S6.** Influence of operating conditions on the pressure drop for continuous dehydrogenation of 1,4-cyclohexanedione.



**Table S2.** Experimental design matrix for semi-continuous dehydrogenation of 1,4-cyclohexanedione

| Experiment Name | Run Order | Factors        |                    |                    |                       | Response                |                          |                         |
|-----------------|-----------|----------------|--------------------|--------------------|-----------------------|-------------------------|--------------------------|-------------------------|
|                 |           | T<br>( $X_1$ ) | $F_G$<br>( $X_2$ ) | $F_L$<br>( $X_3$ ) | $X_{in}$<br>( $X_5$ ) | Conversion<br>( $Y_4$ ) | Selectivity<br>( $Y_5$ ) | $\Delta P$<br>( $Y_6$ ) |
| N1              | 16        | 200            | 5                  | 0.1                | 20                    | 32.3                    | 99.5                     | 2.1                     |
| N2              | 22        | 242            | 85                 | 0.5                | 20                    | 35.7                    | 99.3                     | 9.0                     |
| N3              | 3         | 200            | 5                  | 0.1                | 80                    | 85.2                    | 99.5                     | 1.8                     |
| N4              | 4         | 239            | 5                  | 0.1                | 80                    | 88.2                    | 99.0                     | 1.8                     |
| N5              | 9         | 200            | 5                  | 0.5                | 80                    | 81.7                    | 99.34                    | 5.2                     |
| N6              | 7         | 200            | 85                 | 0.1                | 80                    | 88.7                    | 99.5                     | 6.0                     |
| N7              | 10        | 201            | 85                 | 0.5                | 60                    | 65.6                    | 99.6                     | 9.3                     |
| N8              | 5         | 200            | 31.7               | 0.5                | 20                    | 21.3                    | 99.7                     | 7.8                     |
| N9              | 14        | 200            | 85                 | 0.37               | 20                    | 24.2                    | 99.6                     | 9.8                     |
| N10             | 18        | 241            | 85                 | 0.1                | 40                    | 93.5                    | 92.9                     | 4.1                     |
| N11             | 11        | 243            | 58.3               | 0.1                | 20                    | 79.3                    | 89.4                     | 3.4                     |
| N12             | 2         | 240            | 5                  | 0.5                | 60                    | 77.2                    | 99.5                     | 3.6                     |
| N13             | 19        | 241            | 31.7               | 0.5                | 80                    | 88.1                    | 99.1                     | 10.4                    |
| N14             | 8         | 243            | 5                  | 0.23               | 20                    | 58.6                    | 99.4                     | 2.3                     |
| N15             | 1         | 240            | 85                 | 0.23               | 80                    | 85.6                    | 99.0                     | 7.1                     |
| N16             | 12        | 213            | 85                 | 0.1                | 20                    | 39.4                    | 99.5                     | 5.8                     |
| N17             | 15        | 213            | 5                  | 0.5                | 20                    | 25.5                    | 99.4                     | 4.7                     |
| N18             | 17        | 227            | 85                 | 0.5                | 80                    | 81.8                    | 99.8                     | 11.7                    |
| N19             | 21        | 222            | 45                 | 0.3                | 50                    | 64.3                    | 99.4                     | 6.1                     |
| N20             | 13        | 220            | 45                 | 0.3                | 50                    | 60.4                    | 99.7                     | 6.5                     |
| N21             | 20        | 221            | 45                 | 0.3                | 50                    | 61.6                    | 99.6                     | 6.3                     |
| N22             | 6         | 220            | 45                 | 0.3                | 50                    | 65.6                    | 99.2                     | 5.1                     |
| N23             | 24        | 200            | 58.3               | 0.5                | 95                    | 95.9                    | 99.5                     | 13.6                    |
| N24             | 26        | 221            | 40                 | 0.3                | 0                     | 58.3                    | 99.6                     | 5.2                     |
| N25             | 25        | 239            | 20                 | 0.3                | 0                     | 59.4                    | 99.6                     | 3.8                     |
| N26             | 23        | 219            | 45                 | 0.3                | 95                    | 96.6                    | 99.2                     | 7.0                     |
| N27             | 28        | 238            | 58.3               | 0.1                | 100                   | 100.0                   | 90.6                     | 5.2                     |
| N28             | 30        | 219            | 45                 | 0.3                | 100                   | 100.0                   | 99.6                     | 9.1                     |
| N29             | 29        | 241            | 85                 | 0.1                | 95                    | 97.6                    | 96.6                     | 6.0                     |
| N30             | 27        | 200            | 5                  | 0.5                | 100                   | 100.0                   | 99.6                     | 5.3                     |
| N31             | 33        | 237            | 85                 | 0.5                | 100                   | 100.0                   | 99.7                     | 13.6                    |
| N32             | 31        | 220            | 5                  | 0.5                | 0                     | 9.8                     | 99.4                     | 2.2                     |
| N33             | 32        | 199            | 80                 | 0.2                | 0                     | 40.0                    | 99.5                     | 4.6                     |

$Y_4$  = conversion (X, %),  $Y_5$  = selectivity (S, %),  $Y_6$  = pressure drop ( $\Delta P$ , bar),  $X_1$  = temperature (T, °C),

$X_2$  =  $N_2$  flow ( $F_G$ , mL/min),  $X_3$  = liquid feed flow ( $F_L$ , mL/min),  $X_5$  = reactor inlet conversion ( $X_{in}$ , %).

**Table S3.** Analysis of variance (ANOVA) of fitted model for semi-continuous dehydrogenation

| Source                                  | DF | SS       | MS (variance)         | F     | p    | SD    |
|-----------------------------------------|----|----------|-----------------------|-------|------|-------|
| (a) Conversion, X ( $Y_4$ )             |    |          |                       |       |      |       |
| Total                                   | 30 | 154769   | 5158.98               |       |      |       |
| Constant                                | 1  | 133432   | 133432                |       |      |       |
| Total corrected                         | 29 | 21337.30 | 735.77                |       |      | 27.13 |
| Regression                              | 6  | 19856.30 | 2836.62               | 42.14 | 0    | 53.26 |
| Residual                                | 23 | 1480.96  | 67.32                 |       |      | 8.21  |
| Lack of Fit (LoF)                       | 20 | 1466.16  | 73.31                 | 9.91  | 0.10 | 8.56  |
| Pure error (pe)                         | 2  | 14.80    | 7.40                  |       |      | 2.72  |
| RSD $\times$ sqrt(F(crit)) = 8.56       |    |          |                       |       |      |       |
| SD-pe $\times$ sqrt(F(crit)) = 11.99    |    |          |                       |       |      |       |
| (b) Selectivity, S ( $Y_5$ )            |    |          |                       |       |      |       |
| Total                                   | 33 | 6.69     | 0.20                  |       |      |       |
| Constant                                | 1  | 0.95     | 0.95                  |       |      |       |
| Total corrected                         | 32 | 5.74     | 0.18                  |       |      | 0.42  |
| Regression                              | 6  | 4.18     | 0.70                  | 11.62 | 0    | 0.83  |
| Residual                                | 26 | 1.56     | 0.06                  |       |      | 0.24  |
| Lack of Fit (LoF)                       | 22 | 1.41     | 0.06                  | 1.74  | 0.32 | 0.25  |
| Pure error (pe)                         | 4  | 0.15     | 0.04                  |       |      | 0.19  |
| RSD $\times$ sqrt(F(crit)) = 0.25       |    |          |                       |       |      |       |
| SD-pe $\times$ sqrt(F(crit)) = 0.46     |    |          |                       |       |      |       |
| (c) Pressure drop, $\Delta P$ ( $Y_3$ ) |    |          |                       |       |      |       |
| Total                                   | 31 | 18.05    | 0.58                  |       |      |       |
| Constant                                | 1  | 16.27    | 16.27                 |       |      |       |
| Total corrected                         | 30 | 1.78     | 0.06                  |       |      | 0.24  |
| Regression                              | 5  | 1.62     | 0.32                  | 52.77 | 0    | 0.57  |
| Residual                                | 25 | 0.15     | 0.01                  |       |      | 0.08  |
| Lack of Fit (LoF)                       | 22 | 0.15     | 0.01                  | 2.99  | 0.20 | 0.08  |
| Pure error (pe)                         | 3  | 0.01     | $2.23 \times 10^{-3}$ |       |      | 0.05  |
| RSD $\times$ sqrt(F(crit)) = 0.08       |    |          |                       |       |      |       |
| SD-pe $\times$ sqrt(F(crit)) = 0.14     |    |          |                       |       |      |       |

DF = degree of freedom, SS = sum of square, MS = mean square, SD = standard deviation,

RSD = residual standard deviation, sqrt(F(crit)) = square root of critical F.

**Table S4.** Regression coefficient of models for semi-continuous dehydrogenation

| Model term                                 | Coefficient estimate | Standard error | P                      |
|--------------------------------------------|----------------------|----------------|------------------------|
| (a) Conversion, X ( $Y_4$ )                |                      |                |                        |
| Constant                                   | 63.01                | 2.54           | $1.45 \times 10^{-17}$ |
| $X_1$                                      | 8.58                 | 1.77           | $7.66 \times 10^{-5}$  |
| $X_2$                                      | 1.09                 | 1.91           | 0.58                   |
| $X_3$                                      | -8.74                | 1.85           | $1.02 \times 10^{-4}$  |
| $X_5$                                      | 32.38                | 2.22           | $8.36 \times 10^{-13}$ |
| $X_1 \times X_5$                           | 6.36                 | 2.67           | $7.21 \times 10^{-4}$  |
| $X_3 \times X_5$                           | -9.49                | 2.65           | $1.70 \times 10^{-3}$  |
| $X_5^2$                                    | 10.49                | 4.36           | 0.16                   |
| (b) Selectivity, S ( $Y_5$ )               |                      |                |                        |
| Constant                                   | 0.39                 | 0.08           | $3.23 \times 10^{-5}$  |
| $X_1$                                      | -0.24                | 0.05           | $9.36 \times 10^{-5}$  |
| $X_2$                                      | -0.02                | 0.06           | 0.76                   |
| $X_3$                                      | 0.22                 | 0.05           | 0.66                   |
| $X_5$                                      | -0.03                | 0.06           | 0.09                   |
| $X_3^2$                                    | -0.28                | 0.10           | $7.10 \times 10^{-3}$  |
| $X_1 \times X_3$                           | 0.23                 | 0.06           | $6.31 \times 10^{-4}$  |
| (c) Pressure drop, $\Delta P$ -r ( $Y_6$ ) |                      |                |                        |
| Constant                                   | 0.81                 | 0.03           | $1.49 \times 10^{-21}$ |
| $X_1$                                      | -0.02                | 0.01           | 0.18                   |
| $X_2$                                      | 0.21                 | 0.02           | $5.43 \times 10^{-12}$ |
| $X_3$                                      | 0.17                 | 0.02           | $3.77 \times 10^{-10}$ |
| $X_5$                                      | 0.07                 | 0.02           | $1.85 \times 10^{-4}$  |
| $X_2^2$                                    | -0.15                | 0.03           | $6.81 \times 10^{-5}$  |

DF = degree of freedom, SS = sum of square, MS = mean square, SD = standard deviation, RSD = residual standard deviation, and  $\text{sqrt}(F(\text{crit}))$  = square root of critical F.

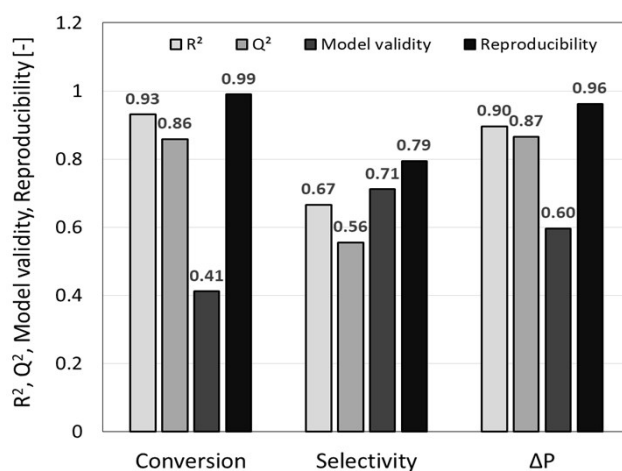**Fig. S7.** The summary of fit for semi-continuous dehydrogenation of 1,4-cyclohexanedione

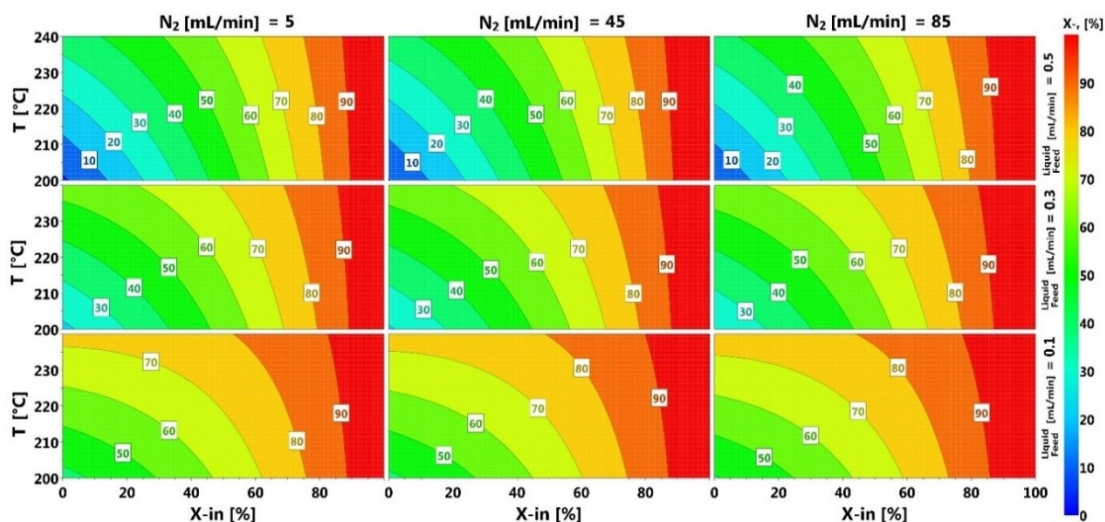

**Fig. S8.** Influence of operating conditions on recycled reactor conversion

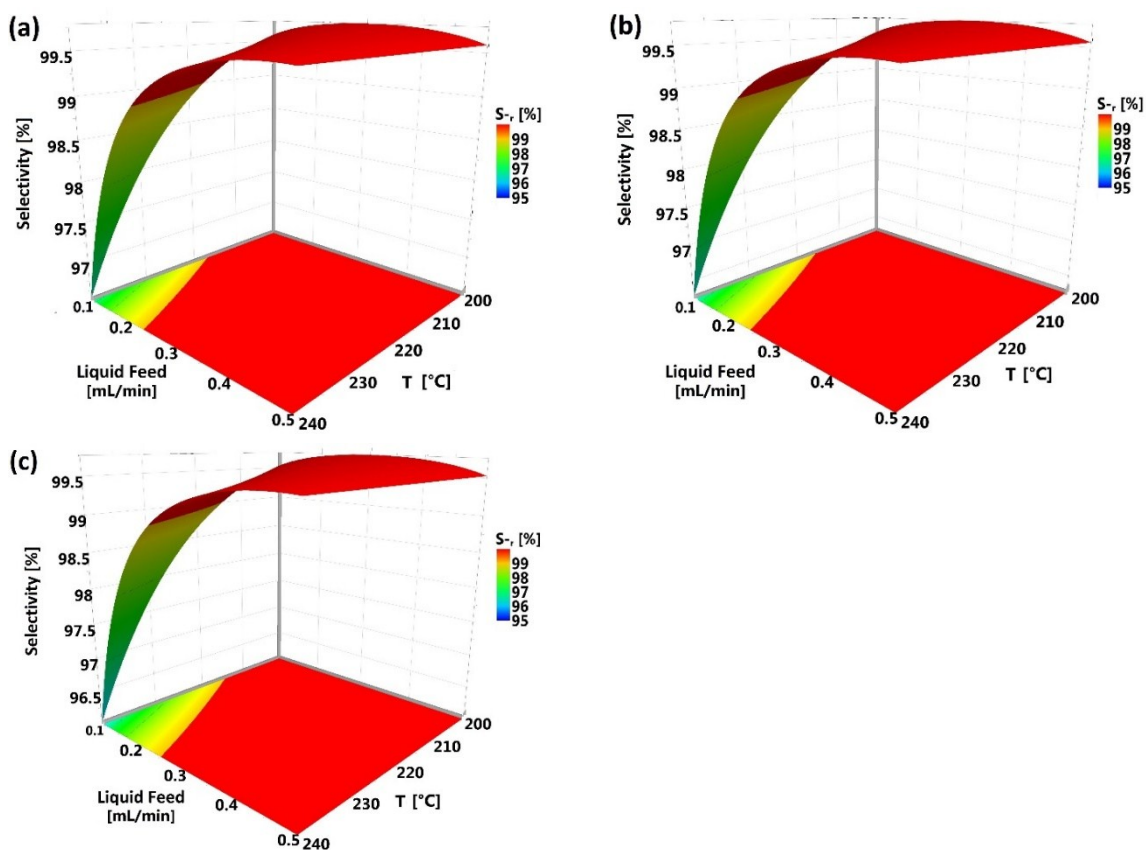

**Fig. S9.** Influence of temperature (180 – 240°C) and liquid feed flow (0.1 – 0.5 mL/min, 0.7 – 3.3 m<sup>3</sup> m<sup>-2</sup> h<sup>-1</sup> at STP) on the selectivity to hydroquinone for N<sub>2</sub> flow of 5 mL/min (33.3 m<sup>3</sup> m<sup>-2</sup> h<sup>-1</sup> at STP) and reactor inlet conversion of 1,4-cyclohexanedione of (a) 0 %, (b) 50 %, (c) 100 %.

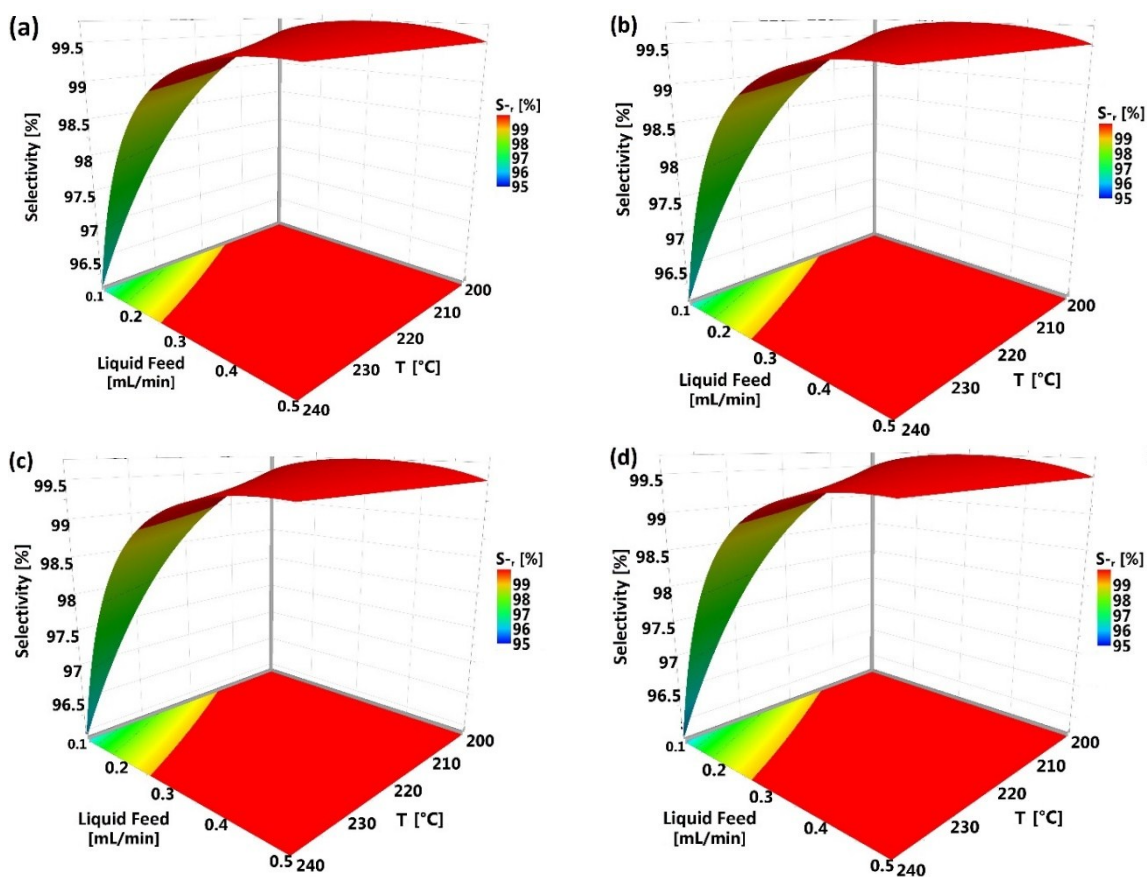

**Fig. S10.** Influence of temperature (180 – 240°C) and liquid feed flow (0.1 – 0.5 mL/min, 0.7 – 3.3 m<sup>3</sup> m<sup>-2</sup> h<sup>-1</sup> at STP) on the selectivity to hydroquinone for reactor inlet conversion of 100% and  $N_2$  flow of (a) 5 mL/min (33.3 m<sup>3</sup> m<sup>-2</sup> h<sup>-1</sup> at STP), (b) 20 mL/min (133.2 m<sup>3</sup> m<sup>-2</sup> h<sup>-1</sup> at STP), (c) 40 mL/min (266.4 m<sup>3</sup> m<sup>-2</sup> h<sup>-1</sup> at STP), (d) 80 mL/min (566.7 m<sup>3</sup> m<sup>-2</sup> h<sup>-1</sup> at STP).

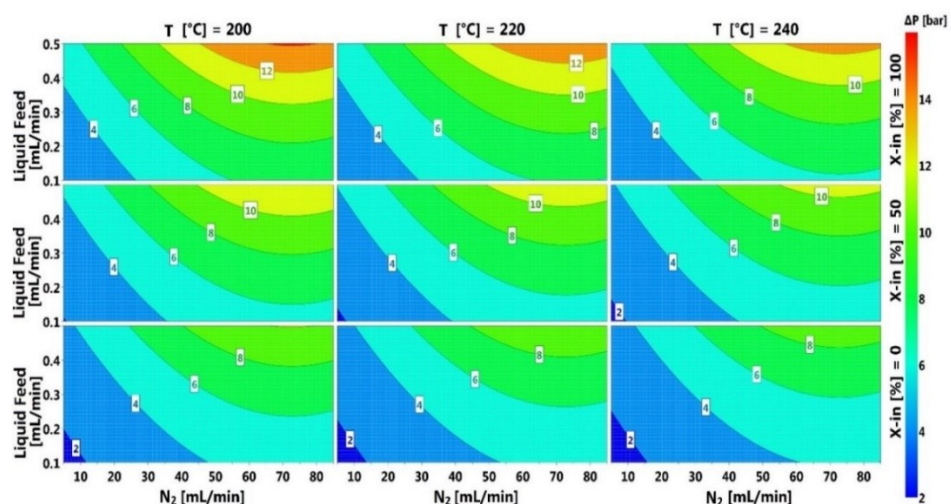

**Fig. S11.** Influence of operating conditions on the pressure drop for continuous dehydrogenation of 1,4-cyclohexanedione

**Table S5.** Influence of 1,4-cyclohexanedione conversion on density and viscosity of feed

| Conversion                | 0 %                  | 50 %                 | 100 %                |
|---------------------------|----------------------|----------------------|----------------------|
| Density kg/m <sup>3</sup> | 803.3                | 806.1                | 808.9                |
| Viscosity g/sec-cm        | $2.6 \times 10^{-3}$ | $2.7 \times 10^{-3}$ | $2.8 \times 10^{-3}$ |

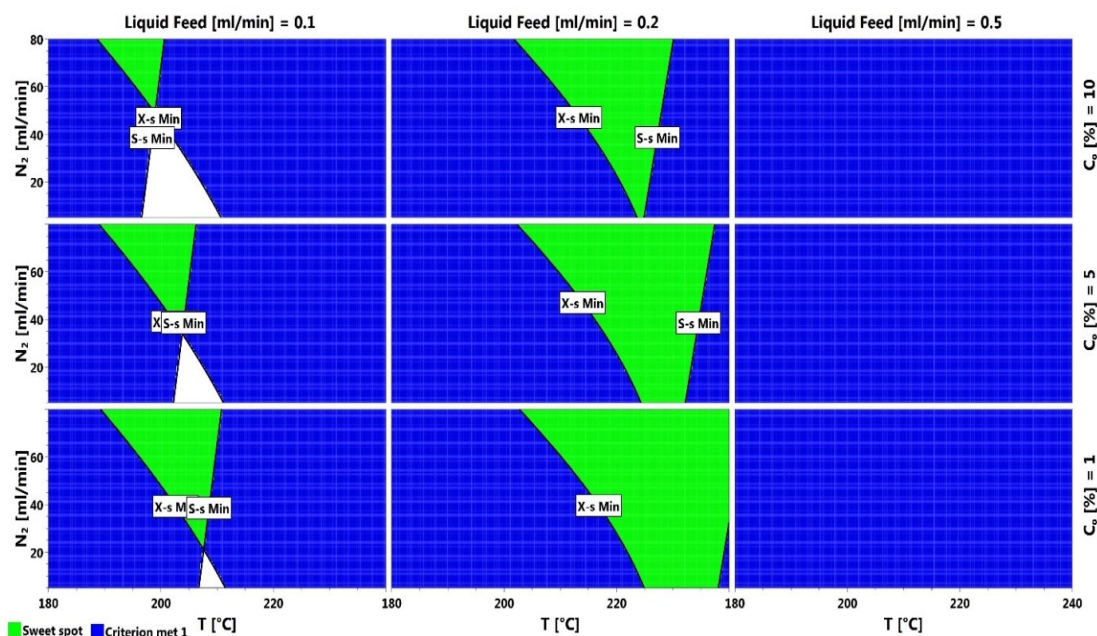

**Fig. S12.** Sweet spot plot with targets of > 40% conversion and > 99% selectivity with varying operating conditions. T= 180 – 240 °C, Liquid feed flow = 0.1 – 0.5 mL/min ( $0.7 - 3.3 \text{ m}^3 \text{ m}^{-2} \text{ h}^{-1}$  at STP), N<sub>2</sub> flow = 5 – 85 mL/min ( $33.3 - 602.1 \text{ m}^3 \text{ m}^{-2} \text{ h}^{-1}$  at STP), and C<sub>o</sub>=1 wt%, 5 wt%, 10 wt%.

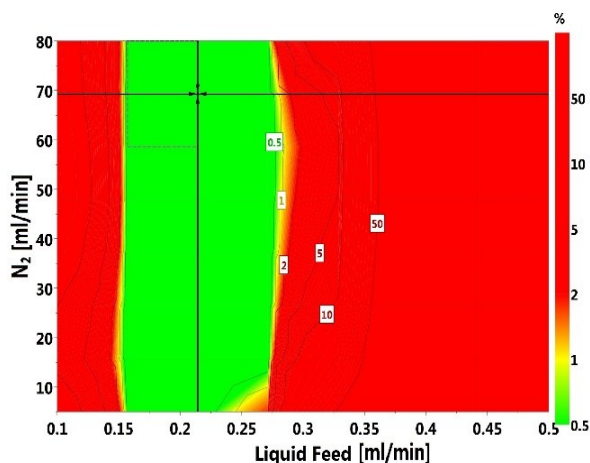

**Fig. S13.** Design Space for the conversion of 1,4-cyclohexanedione as a function of N<sub>2</sub> flow and liquid feed flow. The green area is the operating window to meet the desired specification and red area is showing risk of failure.



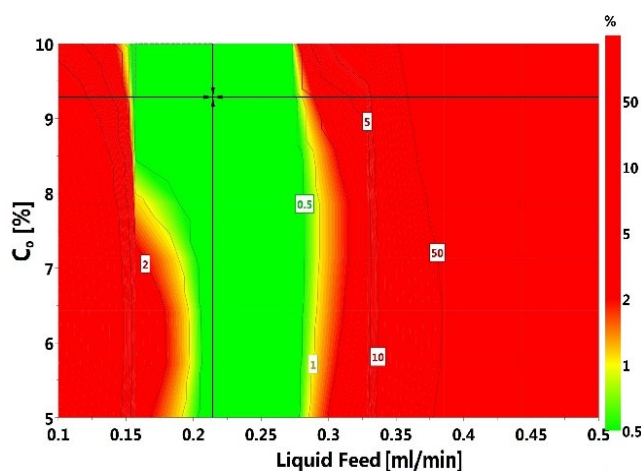

**Fig. S14.** Design Space for the conversion of 1,4-cyclohexanedione as a function of substrate concentration and liquid feed flow. The green area is the operating window to meet the desired specification and red area is showing risk of failure.

**Table S6.** Influence of intermediate gas (nitrogen and hydrogen) on activity and selectivity for the dehydrogenation of 1,4-cyclohexanedione in two-channels-in-series in continuous-mode without hydrogen removal (Data of Fig. 6a)

| Time on stream | Conversion | Selectivity | Conversion                  | Time on stream | Conversion | Selectivity | Conversion                  |
|----------------|------------|-------------|-----------------------------|----------------|------------|-------------|-----------------------------|
| h              | %          | %           | %                           | h              | %          | %           | %                           |
|                | Channel 1  | Channel 1   | Model predicted - Channel 1 |                | Channel 2  | Channel 2   | Model predicted - Channel 2 |
| 0.5            | 62.7       | 99.1        | 55.4                        | 0.5            | 75.7       | 99.0        | 76.1                        |
| 1              | 61.1       | 99.3        | 55.4                        | 1              | 79.2       | 99.1        | 76.1                        |
| 1.5            | 61.4       | 99.1        | 55.4                        | 1.5            | 79.0       | 99.3        | 76.1                        |
| 2              | 59.3       | 99.1        | 55.4                        | 2              | 79.4       | 99.4        | 76.1                        |
| 2.5            | 57.7       | 99.4        | 55.4                        | 2.5            | 78.8       | 99.1        | 76.1                        |
| 3              | 58.7       | 99.7        | 55.4                        | 3.5            | 78.6       | 99.2        | 76.1                        |
| 3.5            | 60.2       | 99.3        | 55.4                        | 4.5            | 78.7       | 99.1        | 76.1                        |
| 4              | 60.2       | 99.4        | 55.4                        | 5              | 78.5       | 99.7        | 76.1                        |
| 4.5            | 58.6       | 99.6        | 55.4                        | 6              | 76.9       | 99.5        | 76.1                        |
| 5              | 59.6       | 99.7        | 55.4                        | 7              | 77.9       | 99.1        | 76.1                        |
| 5.5            | 58.5       | 99.3        | 55.4                        | 7.5            | 78.4       | 99.7        | 76.1                        |
| 6.5            | 58.1       | 99.7        | 55.4                        | --             | --         | --          | --                          |
| 7              | 61.9       | 99.5        | 55.4                        | --             | --         | --          | --                          |
| 7.5            | 59.7       | 99.2        | 55.4                        | --             | --         | --          | --                          |

**Table S7.** Influence of intermediate gas (nitrogen and hydrogen) on activity and selectivity for the dehydrogenation of 1,4-cyclohexanedione in two-channels-in-series in continuous-mode without hydrogen removal (Data of Fig. 6b)

| Time on stream | Conversion | Selectivity | Conversion                  | Time on stream | Conversion | Selectivity | Conversion                  |
|----------------|------------|-------------|-----------------------------|----------------|------------|-------------|-----------------------------|
| h              | %          | %           | %                           | h              | %          | %           | %                           |
|                | Channel 1  | Channel 1   | Model predicted - Channel 1 |                | Channel 2  | Channel 2   | Model predicted - Channel 2 |
| 0.53           | 61.9       | 99.4        | 55.4                        | 0.25           | 68.7       | 82.8        | 76.1                        |
| 1              | 63.4       | 99.3        | 55.4                        | 0.5            | 82.8       | 81.5        | 76.1                        |
| 1.5            | 64.7       | 99.2        | 55.4                        | 1              | 87.0       | 82.4        | 76.1                        |
| 2              | 61.3       | 99.3        | 55.4                        | 1.5            | 85.0       | 84.4        | 76.1                        |
| 2.5            | 65.5       | 99.9        | 55.4                        | 2              | 86.7       | 82.7        | 76.1                        |
| 3              | 64.8       | 99.2        | 55.4                        | 2.5            | 85.4       | 83.7        | 76.1                        |
| 3.5            | 62.1       | 99.5        | 55.4                        | 3              | 86.1       | 82.6        | 76.1                        |
| 4              | 63.5       | 99.9        | 55.4                        | 3.5            | 86.4       | 81.5        | 76.1                        |
| 4.5            | 63.7       | 99.6        | 55.4                        | 4              | 86.9       | 82.9        | 76.1                        |
| 5              | 62.5       | 99.4        | 55.4                        | 4.5            | 86.2       | 81.2        | 76.1                        |
| 5.5            | 63.0       | 99.3        | 55.4                        | 5              | 86.1       | 81.8        | 76.1                        |
| 6              | 61.7       | 99.3        | 55.4                        | 5.5            | 85.4       | 82.7        | 76.1                        |
| 6.5            | 62.1       | 99.1        | 55.4                        | 6              | 85.6       | 82.3        | 76.1                        |
| 7              | 63.1       | 99.4        | 55.4                        | 6.5            | 84.6       | 82.9        | 76.1                        |
| 7.5            | 61.2       | 99.1        | 55.4                        | 7              | 85.7       | 81.6        | 76.1                        |
| 8              | 63.4       | 99.3        | 55.4                        | 7.5            | 85.5       | 81.7        | 76.1                        |
| 8.5            | --         | --          | 55.4                        | 8              | 85.3       | 80.8        | 76.1                        |



**Table S8.** Catalytic activity and selectivity of semi-continuous dehydrogenation (recycle mode) at robust set-point, 231.4 °C, 69.3 mL/min (464.5 m<sup>3</sup> m<sup>-2</sup> h<sup>-1</sup> at STP) nitrogen flow, 0.21 mL/min (1.4 m<sup>3</sup> m<sup>-2</sup> h<sup>-1</sup> at STP) liquid feed flow and 9.28 wt% substrate concentration as a function of stream time (h). (Data of Fig. 11)

| Time on stream | Conversion | Selectivity | Time on stream | Conversion | Selectivity |
|----------------|------------|-------------|----------------|------------|-------------|
| h              | %          | %           | h              | %          | %           |
| 0.17           | 1.4        | 99.3        | 6              | 95.9       | 99.1        |
| 0.5            | 11.1       | 99.2        | 6.5            | 96.7       | 99.3        |
| 1              | 29.7       | 99.7        | 7              | 97.5       | 99.5        |
| 1.5            | 48.5       | 99.2        | 7.5            | 98.1       | 99.2        |
| 2              | 59.3       | 99.5        | 8              | 98.4       | 99.2        |
| 2.5            | 69.3       | 99.3        | 8.5            | 98.8       | 99.4        |
| 3              | 76.8       | 99.2        | 9              | 99.0       | 99.4        |
| 3.5            | 82.3       | 99.3        | 9.5            | 99.2       | 99.1        |
| 4              | 86.4       | 99.1        | 10             | 99.2       | 99.1        |
| 4.5            | 89.7       | 99.5        | 10.5           | 99.3       | 99.5        |
| 5              | 92.4       | 99.4        | 11             | 99.3       | 99.2        |
| 5.5            | 94.3       | 99.6        | 11.5           | 99.4       | 99.4        |
